# Supplementary material for: Patient-reported Reasons for Stopping Care or Switching Clinics in Zambia: A Multisite, Regionally Representative Estimate Using a Multistage Sampling-based Approach in Zambia
Source: PubMed Central journal article supplement (PMC8492131; doi:10.1093/cid/ciaa1501), 2020-10-03
Supplement: ciaa1501_suppl_supplementary_figure_s4.pdf [file ciaa1501_suppl_supplementary_figure_s4.pdf]

## Reasons to return if disengaged (N=255)

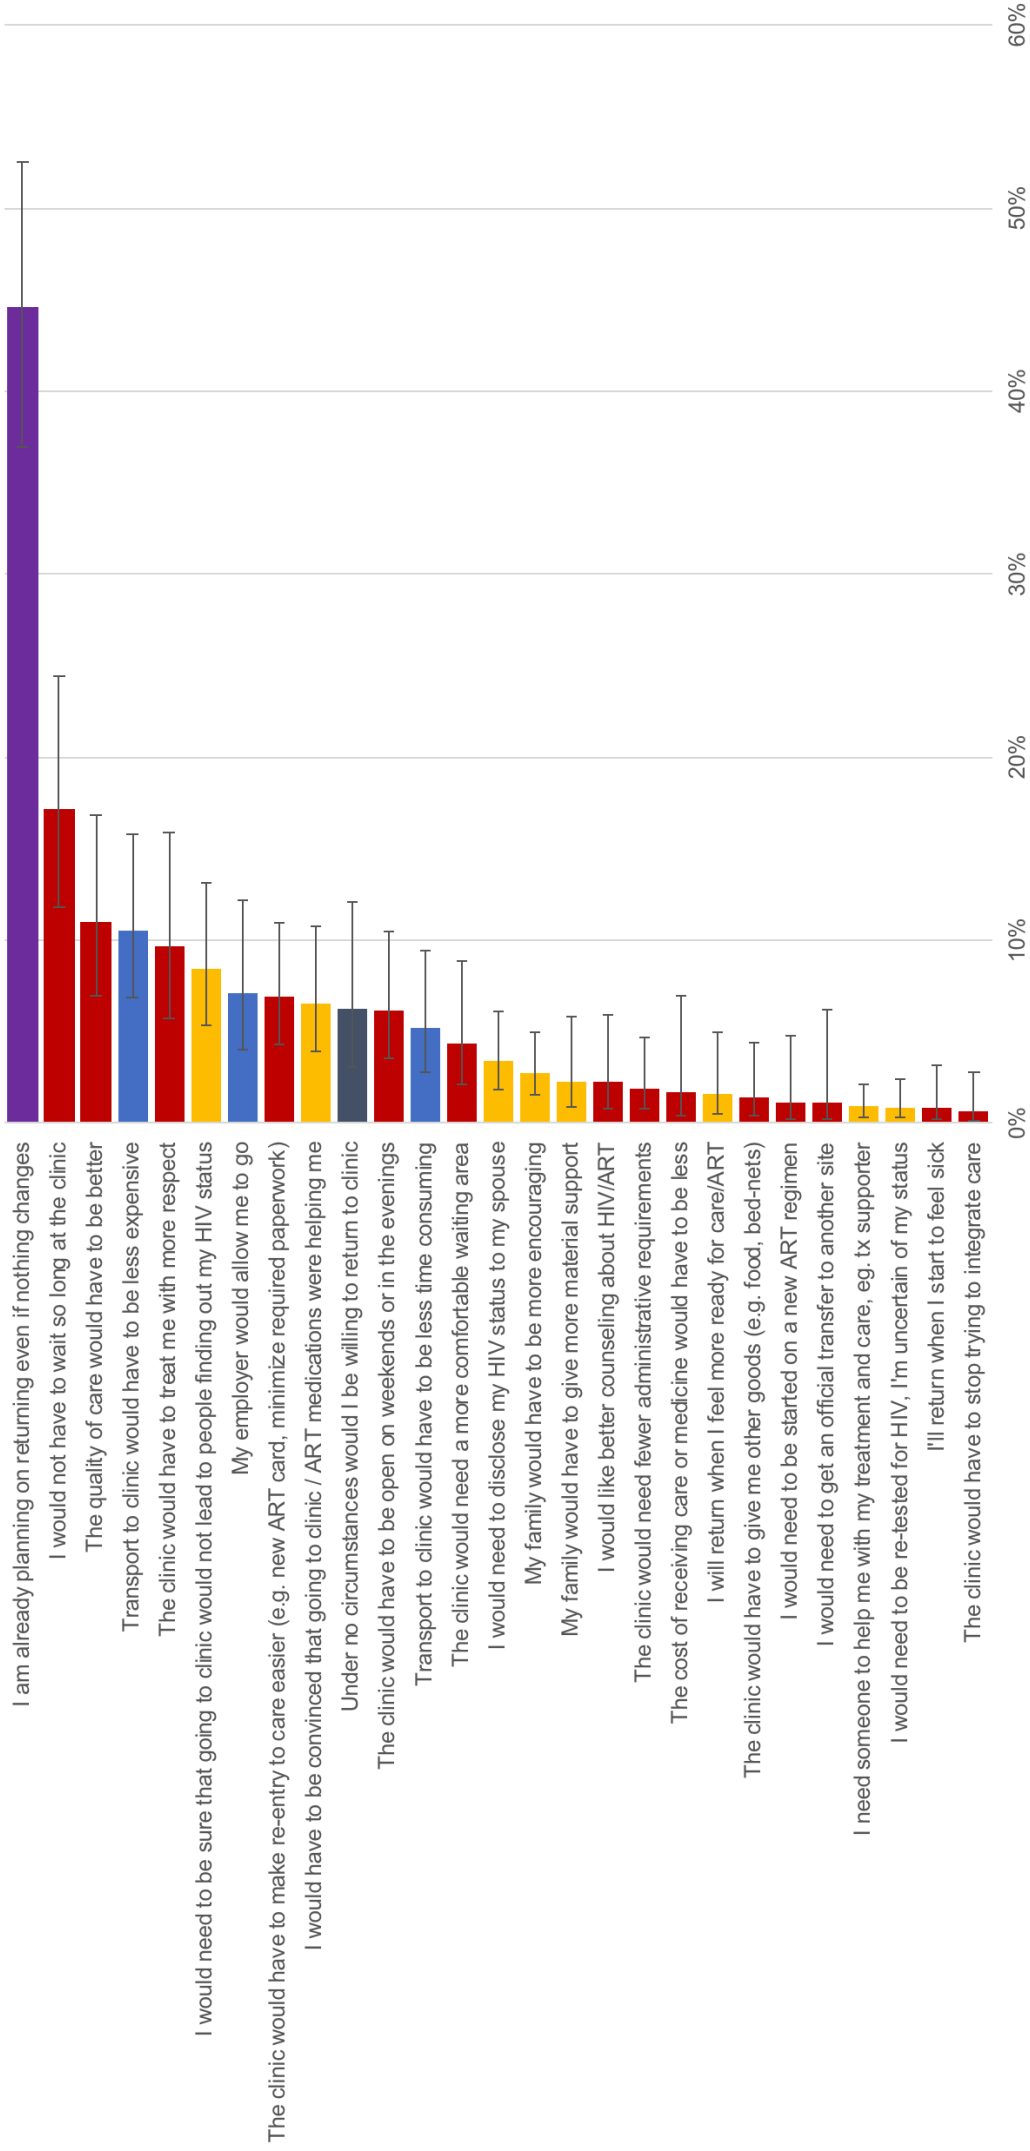

Percentage of patients reporting reason
